# Supplementary material for: Evidence of islet CADM1-mediated immune cell interactions during human type 1 diabetes
Source: PubMed Central journal article supplement (PMC8986082; doi:10.1172/jci.insight.153136), 2022-03-22
Supplement: jciinsight-7-153136-s207.pdf [file jciinsight-7-153136-s207.pdf]

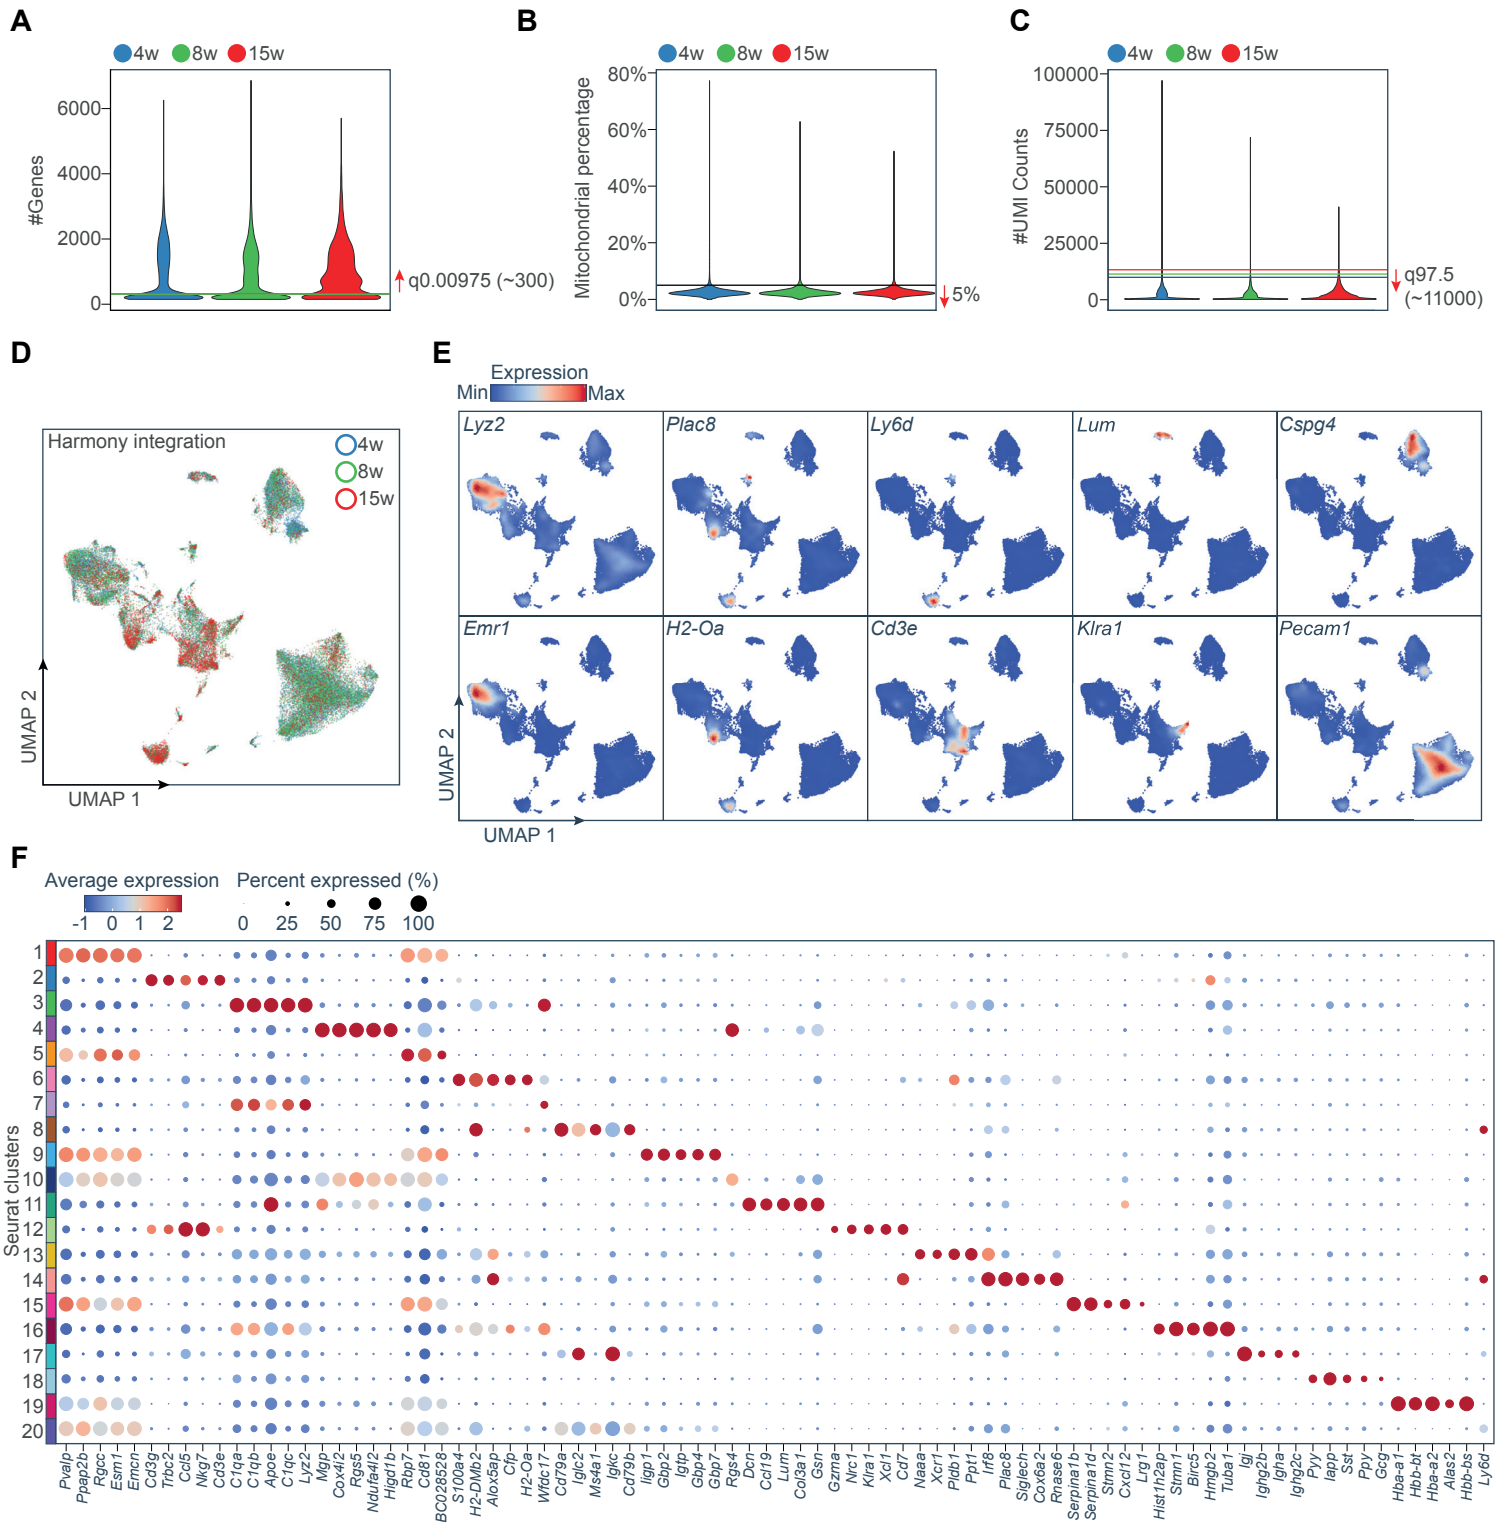

**Supplemental Figure 1. Single-cell analysis revealed novel markers in islet-infiltrating cells during diabetes development.** Violin plots representing the (A) number of genes per cell, (B) mitochondrial genes percentage of all cells before QC, and (C) number of unique molecular identifiers (UMIs) before filtering and clustering. Colored lines indicate the filtering parameter values set for each sample (q indicates quartile). (D) Harmony integration of pancreatic islet cells pooled together from 4, 8, and 15-week-old NOD mice. (E) Feature plots of expression distribution for selected cluster-specific genes. Expression levels for each cell are color-coded and overlaid onto UMAP plot. (F) Top 5 marker genes for the 20 identified clusters. The dot size represents the percentage of cells within a group with an expression level > 0 and color-scale represents the average expression level (row Z-score) across all cells within the cluster.

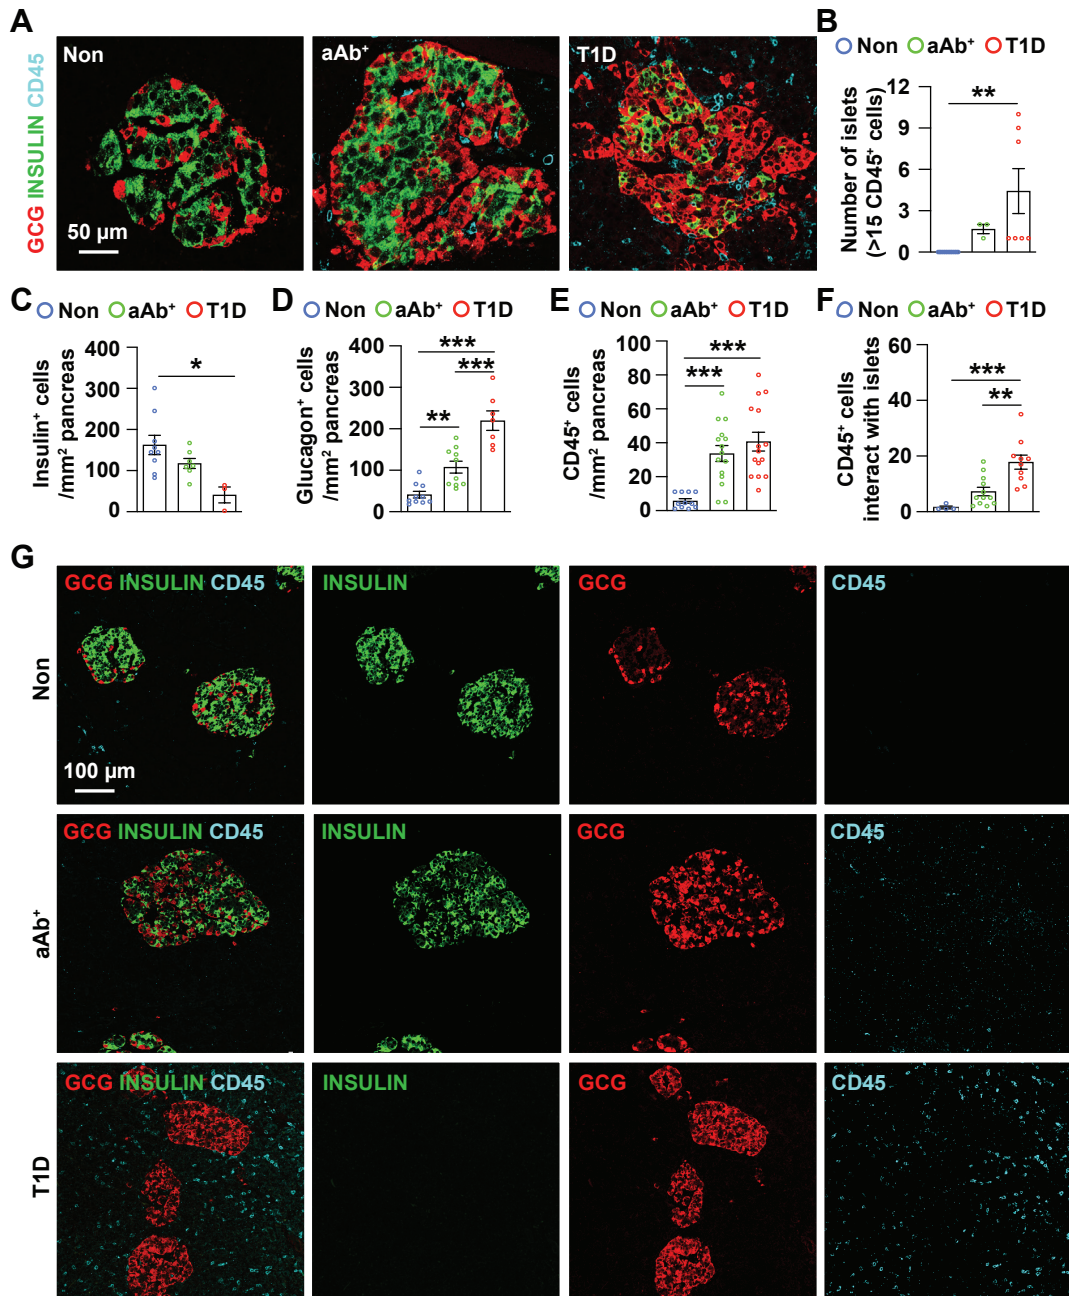

**Supplemental Figure 2. Control immunostaining for human pancreata from nPOD repository.** (A) Immunostaining of paraffin-embedded pancreata from non-diabetic (Non), auto-antibody positive (aAb<sup>+</sup>), and T1D human subjects for insulin (green), glucagon (red), and CD45 (cyan). Scale bar: 50  $\mu$ m. (B) Quantification of number of islets with >15 CD45<sup>+</sup> cells within the islet periphery per mm<sup>2</sup> pancreas from Non, aAb<sup>+</sup>, and T1D human subjects. (C) Quantification of number of insulin<sup>+</sup> cells per mm<sup>2</sup> pancreas from Non, aAb<sup>+</sup>, and T1D human subjects. (D) Quantification of number of glucagon<sup>+</sup> cells per mm<sup>2</sup> pancreas from Non, aAb<sup>+</sup>, and T1D human subjects. (E) Quantification of number of CD45<sup>+</sup> cells per mm<sup>2</sup> pancreas from Non, aAb<sup>+</sup>, and T1D human subjects. (F) Quantification of number of CD45<sup>+</sup> cells adjacent to insulin<sup>+</sup> or glucagon<sup>+</sup> cells in pancreata of Non, aAb<sup>+</sup>, and T1D human subjects. (G) Representative images of immunostaining of glucagon (GCG) (red), insulin (green), and CD45 (cyan) in pancreata of Non, aAb<sup>+</sup>, and T1D human subjects. Scale bar: 100  $\mu$ m. One-way ANOVA analysis has been performed using GraphPad Prism Software Version 7 for comparisons of three groups. Post hoc statistics were performed using Turkey's multiple comparisons test. Results are presented as mean  $\pm$  S.E.M. \* $P$  < 0.05, \*\* $P$  < 0.01, \*\*\* $P$  < 0.001.

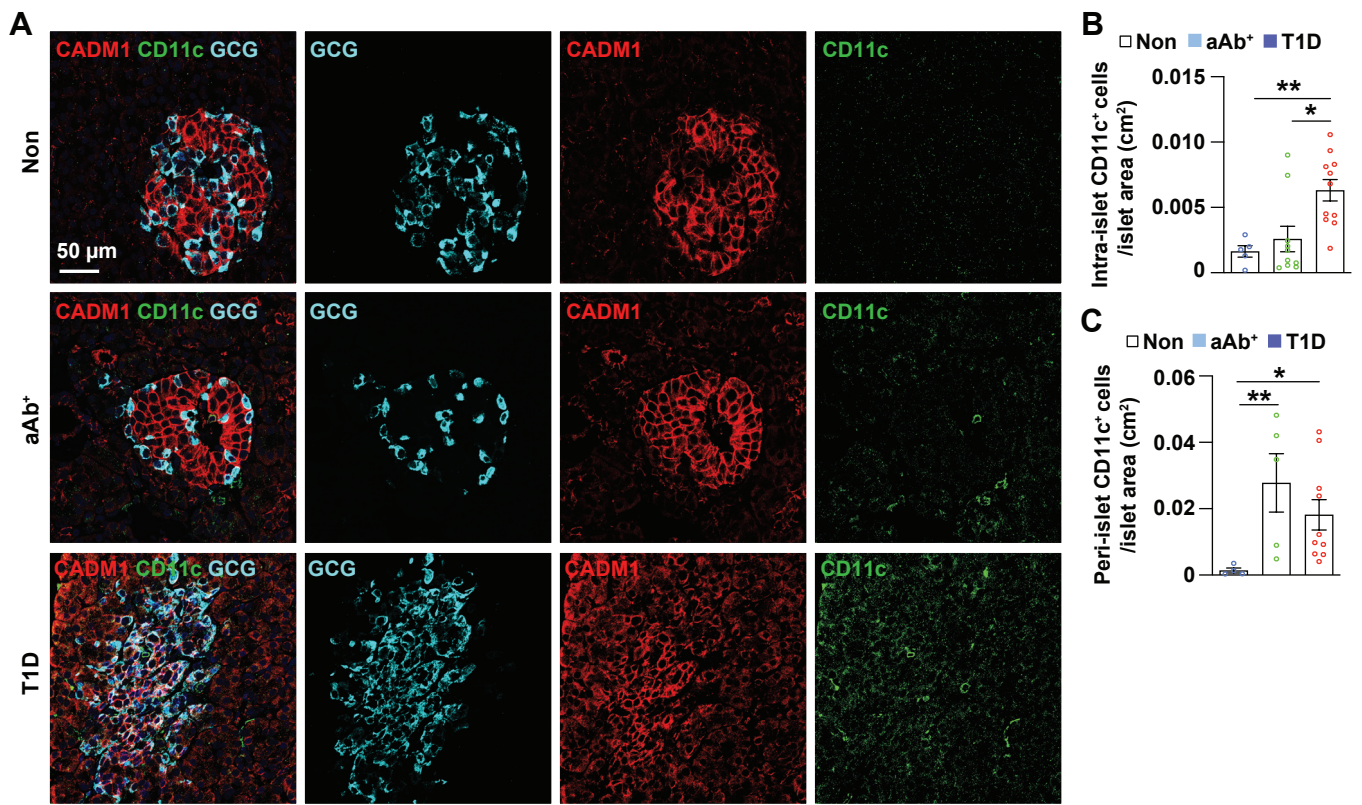

**Supplementary Figure 3. Increased number of CADM1<sup>+</sup> cells adjacent to CD11c<sup>+</sup> cells during T1D.** (A) Immunostaining of paraffin-embedded pancreata from non-diabetic (Non), auto-antibody positive (aAb<sup>+</sup>), and T1D human subjects for CADM1 (red), glucagon (cyan) and CD11c (green). Scale bar: 50  $\mu$ m. (B) Quantification of number of CD11c<sup>+</sup> cells within the islet boundary per cm<sup>2</sup> endocrine pancreas of Non, aAb<sup>+</sup>, and T1D human subjects. (C) Quantification of number of CD11c<sup>+</sup> cells at the islet periphery per cm<sup>2</sup> endocrine pancreas of Non, aAb<sup>+</sup>, and T1D human subjects. One-way ANOVA analysis has been performed using GraphPad Prism Software Version 7 for comparisons of three groups. Post hoc statistics were performed using Turkey's multiple comparisons test. Results are presented as mean  $\pm$  S.E.M. \* $P$  < 0.05, \*\* $P$  < 0.01, \*\*\* $P$  < 0.001.

**Supplemental Table 1.** Demographic information of human pancreatic tissue donors from nPOD program and summary of available donor data including auto-antibody results: GADA, glutamic acid decarboxylase-65; IA-2A, islet antigen-2 or insulinoma antigen-2; ZnT8A, zinc transporter 8; mIAA, insulin autoantibodies. Insulin autoantibody (mIAA) is an important marker of islet autoimmunity and is utilized in confirmation of type 1 diabetes diagnosis; however, assay specificity after a person has been on exogenous insulin for more than 10 days, is no longer able to distinguish insulin autoantibodies from insulin antibodies which form in over 40% of patients treated with subcutaneous insulin (Fineberg et al. *Diabetologia* (1983)). Therefore, mIAA is not a reliable marker of autoimmunity after a donor has been on insulin therapy for more than 10 days.

| nPOD CaseID | RRID         | Donor Type ID | Auto-antibody_Results        | Age (yr) | Duration of diabetes (yrs) | Gender | Race            | BMI (kg/m2) | HbA1c | C-peptide | Cause of death        |
|-------------|--------------|---------------|------------------------------|----------|----------------------------|--------|-----------------|-------------|-------|-----------|-----------------------|
| 6310        | SAMN15879364 | Autoab Pos    | GADA+                        | 28       | -                          | Female | Hispanic/Latino | 22.4        | n/a   | 10.54     | Anoxia                |
| 6314        | SAMN15879368 | Autoab Pos    | GADA+                        | 21       | -                          | Male   | Caucasian       | 23.8        | n/a   | 1.49      | Head Trauma           |
| 6424        | SAMN15879477 | Autoab Pos    | GADA+, mIAA+                 | 17.65    | -                          | Male   | Caucasian       | 51.4        | 5.8   | 6.97      | Head Trauma           |
| 6429        | SAMN15879482 | Autoab Pos    | GADA+, mIAA+                 | 22.1     | -                          | Male   | African Am      | 19.6        | 5.5   | 2.25      | Head Trauma           |
| 6450        | SAMN15879503 | Autoab Pos    | GADA+, ZnT8A+                | 22       | -                          | Female | Caucasian       | 24.4        | 5.7   | 5.47      | Anoxia                |
| 6512        | SAMN15879564 | Autoab Pos    | IA2A+, mIAA+, ZnT8A+         | 30.59    | -                          | Female | Caucasian       | 38.8        | 5.2   | 3.2       | Cerebrovasc./Stroke   |
| 6517        | SAMN18053201 | Autoab Pos    | GADA+                        | 22.14    | -                          | Male   | Caucasian       | 26.6        | 5.6   | 9.74      | Cerebrovasc./Stroke   |
| 6521        | SAMN18053204 | Autoab Pos    | GADA+, IA-2A+, ZnT8A+        | 19.77    | -                          | Male   | Hispanic/Latino | 24.1        | 5.8   | 7.44      | Head Trauma           |
| 6148        | SAMN15879204 | T1D           | GADA+, mIAA+                 | 17.1     | 7                          | Male   | Caucasian       | 23.9        | n/a   | <0.05     | Anoxia                |
| 6195        | SAMN15879251 | T1D           | GADA+, IA-2A+, mIAA+, ZnT8A+ | 19.3     | 5                          | Male   | Caucasian       | 23.7        | n/a   | <0.05     | Head Trauma           |
| 6480        | SAMN15879533 | T1D           | IA2A+, mIAA+                 | 17.18    | 2.5                        | Male   | Caucasian       | 27.0        | 10.2  | 0.13      | Diabetic ketoacidosis |
| 6526        | SAMN18053209 | T1D           | IA2A+, mIAA+                 | 29.74    | 1                          | Male   | Hispanic/Latino | 23          | 6.6   | 0.07      | Anoxia                |
| 6524        | SAMN18053207 | T1D           | GADA+, IA-2A+, mIAA+, ZnT8A+ | 20.07    | 8                          | Male   | Caucasian       | 29.5        | 6.5   | 0.03      | Head Trauma           |
| 6520        | SAMN18053203 | T1D           | GADA+, IA-2A+, ZnT8A+        | 21.61    | 0                          | Male   | Caucasian       | 29.3        | 11.9  | 0.37      | Cerebrovasc./Stroke   |
| 6449        | SAMN15879502 | T1D           | IA-2A+, mIAA+, ZnT8A+        | 24       | 2                          | Male   | Caucasian       | 23          | 10.2  | 0.03      | Head Trauma           |
| 6399        | SAMN15879452 | T1D           | GADA+, IA-2A+, ZnT8A+        | 17.42    | 0                          | Male   | Caucasian       | 32          | 10.4  | 1.41      | Anoxia                |
| 6098        | SAMN15879155 | No diabetes   | negative                     | 17.8     | -                          | Male   | Caucasian       | 22.8        | 4.9   | 1.41      | Head Trauma           |
| 6174        | SAMN15879230 | No diabetes   | negative                     | 20.9     | -                          | Male   | Caucasian       | 19.5        | n/a   | 3         | Cerebrovasc./Stroke   |
| 6389        | SAMN15879442 | No diabetes   | negative                     | 18.6     | -                          | Male   | Caucasian       | 20.93       | 5.1   | 7.22      | Head Trauma           |
| 6516        | SAMN18053200 | No diabetes   | negative                     | 20.75    | -                          | Male   | Caucasian       | 28.8        | 5.5   | 8.91      | Head Trauma           |
| 6492        | SAMN15879545 | No diabetes   | negative                     | 28.56    | -                          | Male   | Hispanic/Latino | 26.6        | 6.2   | 2.13      | Head Trauma           |
| 6509        | SAMN15879561 | No diabetes   | negative                     | 18.72    | -                          | Male   | Caucasian       | 25.8        | 5.4   | 2.21      | Head Trauma           |
| 6479        | SAMN15879532 | No diabetes   | negative                     | 21.67    | -                          | Female | Hispanic/Latino | 20.9        | 5     | 1.74      | Anoxia                |
| 6229        | SAMN15879285 | No diabetes   | negative                     | 31       | -                          | Female | Caucasian       | 26.9        | 5.5   | 6.23      | Head Trauma           |

**Supplemental Table 2. Summary of statistical analyses.** All statistical analysis for each figure including n numbers for each test cohort, statistical test performed, and resulting P values for all comparisons.

| Figure | Sample size (n)                        | Statistical Test                                             | Values                                                                                                                       |
|--------|----------------------------------------|--------------------------------------------------------------|------------------------------------------------------------------------------------------------------------------------------|
| 3C     | ND (n=7)<br>aAb+ (n=9)<br>T1D (n=10)   | Ordinary one-way ANOVA<br>Turkey's multiple comparisons test | Summary: F=3.602, P =0.0432<br>Multiple comparison:<br>ND vs aAb*: P=0.3466<br>ND vs T1D: P=0.0344<br>T1D vs aAb*: P=0.4014  |
| 3D     | ND (n=14)<br>aAb+ (n=12)<br>T1D (n=11) | Ordinary one-way ANOVA<br>Turkey's multiple comparisons test | Summary: F=40.55, P<0.0001<br>Multiple comparison:<br>ND vs aAb*: P=0.0002<br>ND vs T1D: P<0.0001<br>T1D vs aAb*: P=0.0004   |
| 4B     | ND (n=17)<br>aAb+ (n=15)<br>T1D (n=10) | Ordinary one-way ANOVA<br>Turkey's multiple comparisons test | Summary: F = 15.07, P<0.0001<br>Multiple comparison:<br>ND vs aAb*: P=0.0026<br>ND vs T1D: P<0.0001<br>T1D vs aAb*: P=0.1168 |
| 4C     | ND (n=17)<br>aAb+ (n=15)<br>T1D (n=10) | Ordinary one-way ANOVA<br>Turkey's multiple comparisons test | Summary: F=16.01, P<0.0001<br>Multiple comparison:<br>ND vs aAb*: P<0.0001<br>ND vs T1D: P=0.0001<br>T1D vs aAb*: P=0.9808   |
| 4D     | ND (n=13)<br>aAb+ (n=14)<br>T1D (n=10) | Ordinary one-way ANOVA<br>Turkey's multiple comparisons test | Summary: F=12.78, P<0.0001<br>Multiple comparison:<br>ND vs aAb*: P=0.1074<br>ND vs T1D: P<0.0001<br>T1D vs aAb*: P=0.0085   |
| 4E     | ND (n=7)<br>aAb+ (n=6)<br>T1D (n=7)    | Ordinary one-way ANOVA<br>Turkey's multiple comparisons test | Summary: F=12.44, P=0.0005<br>Multiple comparison:<br>ND vs aAb*: P=0.048<br>ND vs T1D: P=0.0003<br>T1D vs aAb*: P=0.0996    |
| 5B     | ND (n=12)<br>aAb+ (n=12)<br>T1D (n=10) | Ordinary one-way ANOVA<br>Turkey's multiple comparisons test | Summary: F=77.35, P<0.0001<br>Multiple comparison:<br>ND vs aAb*: P<0.0001<br>ND vs T1D: P<0.0001<br>T1D vs aAb*: P=0.0061   |
| 5C     | ND (n=10)<br>aAb+ (n=12)<br>T1D (n=14) | Ordinary one-way ANOVA<br>Turkey's multiple comparisons test | Summary: F=37.79, P<0.0001<br>Multiple comparison:<br>ND vs aAb*: P=0.0002<br>ND vs T1D: P<0.0001<br>T1D vs aAb*: P=0.0006   |
| 5D     | ND (n=7)<br>aAb+ (n=8)<br>T1D (n=9)    | Ordinary one-way ANOVA<br>Turkey's multiple comparisons test | Summary: F=11.38, P=0.0004<br>Multiple comparison:<br>ND vs aAb*: P=0.003<br>ND vs T1D: P=0.0005<br>T1D vs aAb*: P=0.7949    |
| 6B     | ND (n=3)<br>aAb+ (n=10)<br>T1D (n=11)  | Ordinary one-way ANOVA<br>Turkey's multiple comparisons test | Summary: F=4.340, P=0.028<br>Multiple comparison:<br>ND vs aAb*: P=0.0375<br>ND vs T1D: P=0.0275<br>T1D vs aAb*: P=0.9853    |
| 6C     | ND (n=9)<br>aAb+ (n=9)<br>T1D (n=9)    | Ordinary one-way ANOVA<br>Turkey's multiple comparisons test | Summary: F=12.64, P=0.0002<br>Multiple comparison:<br>ND vs aAb*: P=0.034<br>ND vs T1D: P=0.0001<br>T1D vs aAb*: P=0.0762    |
| 6E     | ND (n=6)<br>aAb+ (n=3)<br>T1D (n=3)    | Ordinary one-way ANOVA<br>Turkey's multiple comparisons test | Summary: F=24.62, P=0.0002<br>Multiple comparison:<br>ND vs aAb*: P=0.0002<br>ND vs T1D: P=0.0094<br>T1D vs aAb*: P=0.0748   |
| 6F     | ND (n=6)<br>aAb+ (n=3)<br>T1D (n=3)    | Ordinary one-way ANOVA<br>Turkey's multiple comparisons test | Summary: F=16.32, P=0.001<br>Multiple comparison:<br>ND vs aAb*: P=0.0021<br>ND vs T1D: P=0.0046<br>T1D vs aAb*: P=0.8829    |

|                      |                                        |                                                                                |                                                                                                                                |
|----------------------|----------------------------------------|--------------------------------------------------------------------------------|--------------------------------------------------------------------------------------------------------------------------------|
| <b>7C</b>            | ND (n=5)<br>aAb+ (n=5)<br>T1D (n=5)    | Two-way repeated-measure ANOVA<br>Post-hoc multiple comparisons test (Sidak's) | Interaction: F = 0.1505, P>0.9999<br>Distance: F = 0.1843, P>0.9999<br>Genotype: F =1310, P<0.0001                             |
| <b>7D</b>            | ND (n=5)<br>aAb+ (n=5)<br>T1D (n=5)    | Two-way repeated-measure ANOVA<br>Post-hoc multiple comparisons test (Sidak's) | Interaction: F = 0.03389, P>0.9999<br>Distance: F = 0.03359, P>0.9999<br>Genotype: F =983, P<0.0001                            |
| <b>8C</b>            | ND (n=10)<br>aAb+ (n=11)<br>T1D (n=11) | Ordinary one-way ANOVA<br>Turkey's multiple comparisons test                   | Summary: F=12.45, P=0.0001<br>Multiple comparison:<br>ND vs aAb*: P=0.0049<br>ND vs T1D: P=0.0001<br>T1D vs aAb*: P=0.3192     |
| <b>Suppl.2B</b>      | ND (n=12)<br>aAb+ (n=3)<br>T1D (n=7)   | Ordinary one-way ANOVA<br>Turkey's multiple comparisons test                   | summary: F = 7.330, P = 0.0044<br>Multiple comparison:<br>ND vs aAb*: P=0.5485<br>ND vs T1D: P=0.0031<br>T1D vs aAb*: P=0.2516 |
| <b>Suppl.2C</b>      | ND (n=9)<br>aAb+ (n=7)<br>T1D (n=3)    | Ordinary one-way ANOVA<br>Turkey's multiple comparisons test                   | Summary: F=5.686, P=0.0136<br>Multiple comparison:<br>ND vs aAb*: P=0.2636<br>ND vs T1D: P=0.0113<br>T1D vs aAb*: P=0.1382     |
| <b>Suppl.2D</b>      | ND (n=10)<br>aAb+ (n=10)<br>T1D (n=7)  | Ordinary one-way ANOVA<br>Turkey's multiple comparisons test                   | Summary: F=33.11, P<0.0001<br>Multiple comparison:<br>ND vs aAb*: P=0.0075<br>ND vs T1D: P<0.0001<br>T1D vs aAb*: P<0.0001     |
| <b>Suppl.2E</b>      | ND (n=11)<br>aAb+ (n=15)<br>T1D (n=15) | Ordinary one-way ANOVA<br>Turkey's multiple comparisons test                   | Summary: F=13.95, P<0.0001<br>Multiple comparison:<br>ND vs aAb*: P=0.2665<br>ND vs T1D: P=0.0006<br>T1D vs aAb*: P=0.0018     |
| <b>Suppl.2F</b>      | ND (n=4)<br>aAb+ (n=12)<br>T1D (n=10)  | Ordinary one-way ANOVA<br>Turkey's multiple comparisons test                   | Summary: F=12.67, P=0.0002<br>Multiple comparison:<br>ND vs aAb*: P=0.0007<br>ND vs T1D: P<0.0001<br>T1D vs aAb*: P=5128       |
| <b>Suppl.3B</b>      | ND (n=5)<br>aAb+ (n=10)<br>T1D (n=11)  | Ordinary one-way ANOVA<br>Turkey's multiple comparisons test                   | Summary: F=7.513, P=0.0031<br>Multiple comparison:<br>ND vs aAb*: P=0.7957<br>ND vs T1D: P=0.0095<br>T1D vs aAb*: P=0.0106     |
| <b>Suppl.3C</b>      | ND (n=4)<br>aAb+ (n=5)<br>T1D (n=10)   | Ordinary one-way ANOVA<br>Turkey's multiple comparisons test                   | Summary: F=3.644, P=0.0497<br>Multiple comparison:<br>ND vs aAb*: P=0.0411<br>ND vs T1D: P=0.1618<br>T1D vs aAb*: P=0.4723     |
| <b>Suppl.Table 1</b> | ND (n=8)<br>aAb+ (n=8)<br>T1D (n=8)    | Two-tailed unpaired Student's t-tes                                            | ND vs aAb*: t=1.243, P=0.2344<br>ND vs T1D: t=1.426, P=0.1758<br>T1D vs aAb*: t=0.6131, P=0.5496                               |
