# Supplementary material for: Evidence of islet CADM1-mediated immune cell interactions during human type 1 diabetes
Source: JCI journal article supplement (doi:10.1172/jci.insight.153136), 2022-02-08
Supplement: sd2 [file 2]

You are being redirected.
